# Supplementary material for: Screen‐Printed Flexible Bandstop Filter on Polyethylene Terephthalate Substrate Based on Ag Nanoparticles
Source: Hindawi journal article supplement (doi:10.1155/2015/978562), 2015-01-01
Supplement: f1 [file 978562.f1.pdf]

# Screen-Printed Flexible Bandstop Filter on Polyethylene Terephthalate Substrate Based on Ag Nanoparticles

Rajendra Dhakal<sup>1#</sup>, Younsu Jung<sup>2</sup>, Hyejin Park<sup>2</sup>, Gyoujin Cho<sup>2</sup>, Nam Young Kim<sup>1\*</sup>

<sup>1</sup>Department of Electronic Engineering, Kwangwoon University, Seoul, Korea

<sup>2</sup>Department of Printed Electronics and Chemical Engineering, Sunchon National University,  
Sunchon, Korea

E-mail: aperioraj@gmail.com<sup>#</sup> and nykim@kw.ac.kr<sup>\*</sup>

Corresponding author: Nam-Young Kim

Manuscript Number: 978562

Supplementary materials:

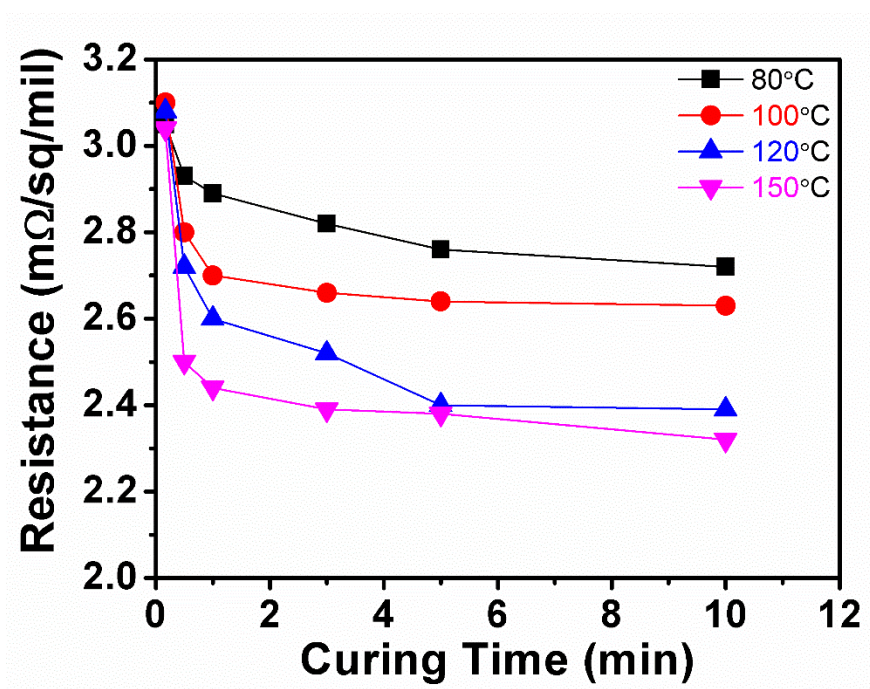

Figure S1: Curing-time-dependent sheet resistance of Ag electroplated signal line with different temperature.

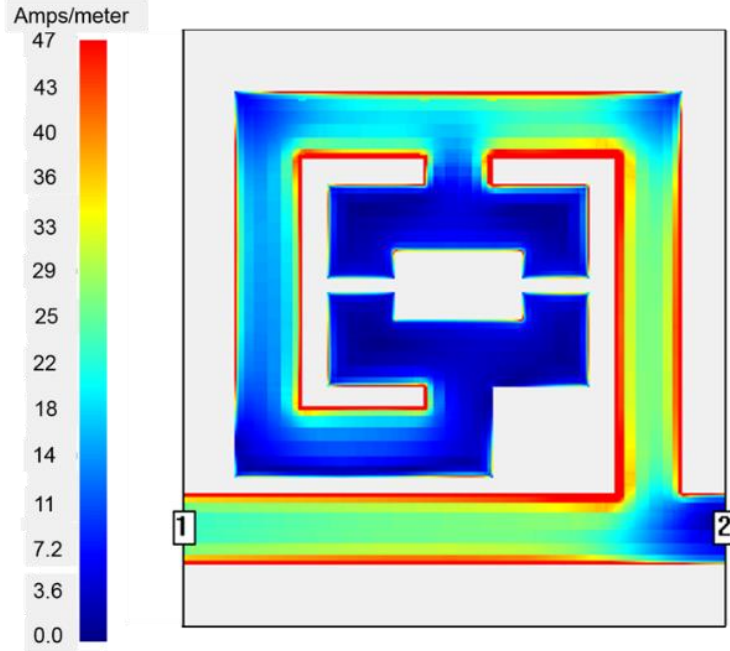

Figure S2: Current density at the resonance frequency. The red portion shows the maximum value of the current flow at the edge of the meandered-line at the high frequency of 4.35 GHz.

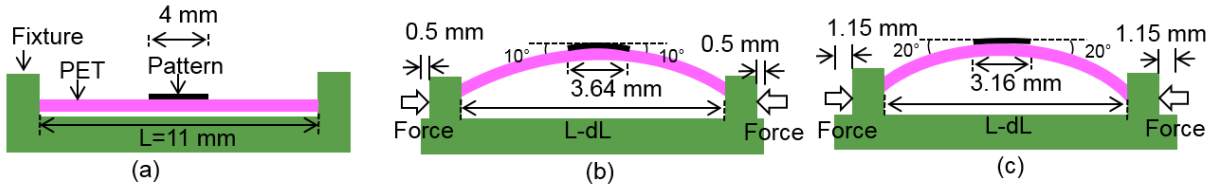

Figure S3: Schematic representation of the mechanical property of the PET substrate for a bending angle of (a) 0°, (b) 10°, and (c) 20°. The applied external strains ( $dL/L$ ) were calculated as 9.09% and 20.90%, respectively, where  $L$  is the initial length of the substrate and  $dL$  fractional change in horizontal length. For the applied strain of approximately 40%, the cracking in the pattern was observed.
